# Supplementary material for: Comparative Proteomic Analysis of Taenia solium Cysticercus and Adult Stages
Source: Research Square preprint supplement (doi:10.21203/rs.3.rs-1335181/v1), 2022-02-08
Supplement: Supplementary file 1 [file cd3d5bb1e99d66c28c1574fb.xlsx]

## Sheet: Sheet1
GO Terms Level 1	GO Terms Description	Fisher's exact test P value	Protein accession	Protein description	Ratio	Regulated Type	P value	Gene name	Mol. weight [kDa]
Biological Process	humoral immune response	0.344952	A0A0R3W7G4	Proliferating cell nuclear antigen OS=Taenia asiatica OX=60517 GN=TASK_LOCUS6219 PE=3 SV=1	2.269	Up	0.003222	TASK_LOCUS6219	28.396
Biological Process	humoral immune response	0.344952	A0A0R3WEJ0	Glyceraldehyde-3-phosphate dehydrogenase OS=Taenia asiatica OX=60517 GN=TASK_LOCUS9240 PE=3 SV=1	43.118	Up	0.0072958	TASK_LOCUS9240	36.624
