# Supplementary material for: Comparative Proteomic Analysis of Taenia solium Cysticercus and Adult Stages
Source: Research Square preprint supplement (doi:10.21203/rs.3.rs-1335181/v1), 2022-02-08
Supplement: Supplementary file 2 [file fd11844402974fdd97cd29c2.xlsx]

## Sheet: Sheet1
Protein accession	Protein description	A/L Ratio	Regulated Type	A/L P value	Gene name	Mol. weight [kDa]
A0A0R3W648	Annexin B2(predicted) OS=Taenia asiatica OX=60517 PE=4 SV=1	0.215	Down	4.0144e-06	---	35.844
A0A0R3W2E7	Calcium binding protein 39(predicted) OS=Taenia asiatica OX=60517 GN=TASK_LOCUS3984 PE=4 SV=1	0.194	Down	3.1468e-06	TASK_LOCUS3984	45.575
A0A0R3W593	Calcium binding protein(predicted) OS=Taenia asiatica OX=60517 GN=TASK_LOCUS5274 PE=4 SV=1	0.224	Down	4.6992e-06	TASK_LOCUS5274	17.493
A0A0R3WC83	cAMP-dependent protein kinase catalytic subunit alpha(predicted) OS=Taenia asiatica OX=60517 GN=TASK_LOCUS8303 PE=3 SV=1	0.328	Down	6.2599e-05	TASK_LOCUS8303	44.22
A0A0R3WB82	EF-hand domain-containing protein(predicted) OS=Taenia asiatica OX=60517 GN=TASK_LOCUS7877 PE=4 SV=1	0.275	Down	3.6025e-05	TASK_LOCUS7877	43.494
A0A0R3VT29	Fatty acid binding protein FABP2(predicted) OS=Taenia asiatica OX=60517 GN=TASK_LOCUS367 PE=4 SV=1	0.307	Down	5.7085e-05	TASK_LOCUS367	19.375
A0A0R3VSW8	Fructose-bisphosphate aldolase OS=Taenia asiatica OX=60517 GN=TASK_LOCUS293 PE=3 SV=1	0.444	Down	0.00148405	TASK_LOCUS293	39.712
A0A0R3VWQ6	SH2 domain-containing protein(predicted) OS=Taenia asiatica OX=60517 GN=TASK_LOCUS1851 PE=4 SV=1	0.119	Down	6.3029e-07	TASK_LOCUS1851	68.464
A0A158R8V5	Annexin OS=Taenia asiatica OX=60517 GN=TASK_LOCUS6159 PE=3 SV=1	0.373	Down	0.000179198	TASK_LOCUS6159	42.195
A0A0R3WHC3	Calcium binding mitochondrial carrier protein(predicted) OS=Taenia asiatica OX=60517 GN=TASK_LOCUS10267 PE=4 SV=1	0.407	Down	0.00037723	TASK_LOCUS10267	20.65
A0A158R773	Calpain A(predicted) OS=Taenia asiatica OX=60517 GN=TASK_LOCUS3297 PE=3 SV=1	0.141	Down	9.8397e-07	TASK_LOCUS3297	92.536
A0A0R3W1C8	Calpain catalytic domain-containing protein(predicted) OS=Taenia asiatica OX=60517 GN=TASK_LOCUS3530 PE=3 SV=1	0.196	Down	3.3193e-06	TASK_LOCUS3530	53.013
A0A158R8B4	Protein kinase domain-containing protein(predicted) OS=Taenia asiatica OX=60517 GN=TASK_LOCUS5105 PE=3 SV=1	0.381	Down	0.00021528	TASK_LOCUS5105	35.099
